# Supplementary material
Source: MDPI journal article supplement (https://www.mdpi.com/2073-4352/11/4/396)
Supplement: s1 [file s1]

Archive with 2 entries (2 files):
- checkcif.pdf
- crystals-1164714-supplementary-for proof.docx
