# Supplementary material
Source: MDPI journal article supplement (https://www.mdpi.com/2073-4352/11/4/396)
Supplement: s1 [file s1 › crystals-1164714-supplementary-for proof.docx]

Supplementary Materials

1,12-Diiodo-*Ortho*-Carborane: A Classic Textbook Example of the Dihalogen Bond

Kyrill Yu. Suponitsky 1,*, Alexei A. Anisimov 1,2, Sergey A. Anufriev 1, Igor B. Sivaev 1,*, Vladimir I. Bregadze 1

1 A.N. Nesmeyanov Institute of Organoelement Compounds, Russian Academy of Sciences, 28 Vavilov Str., 119991 Moscow, Russia; anisimov.alex.a@gmail.com (A.A.A.); trueman476@mail.ru (S.A.A.); [bre@ineos.ac.ru](mailto:bre@ineos.ac.ru) (V.I.B.)

2 Higher Chemical College at the Russian Academy of Sciences, D.I. Mendeleev Russian Chemical Technological University, 9 Miusskaya Sq., 125047 Moscow, Russia

* Correspondence: [kirshik@yahoo.com](mailto:kirshik@yahoo.com) (K.Y.S.); [sivaev@ineos.ac.ru](mailto:sivaev@ineos.ac.ru) (I.B.S.)

The compound 1-iodo-*ortho*-carborane 1-I-1,2-C2B10H11 crystallizes in the orthorhombic *Pnma* space group. One molecule of 1-I-1,2-C2B10H11 occupies a special position on the mirror plane. The C2 and B4 atoms are disordered over two positions due to the mirror plane (Figure S1). At the same time, lowering of symmetry does not lead to disappearing of the disorder and results in a decrease in quality of crystallographic data. A general view of 1-I-1,2-C2B10H11 is provided in Figure S2.


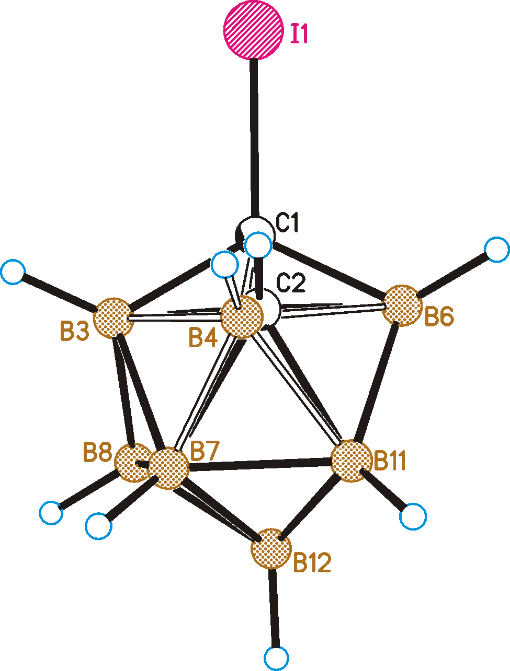


**Figure S1.** Asymmetric part of 1-I-1,2-C2B10H11 molecule showing numbering scheme and the disorder of the C2/B4 atoms.


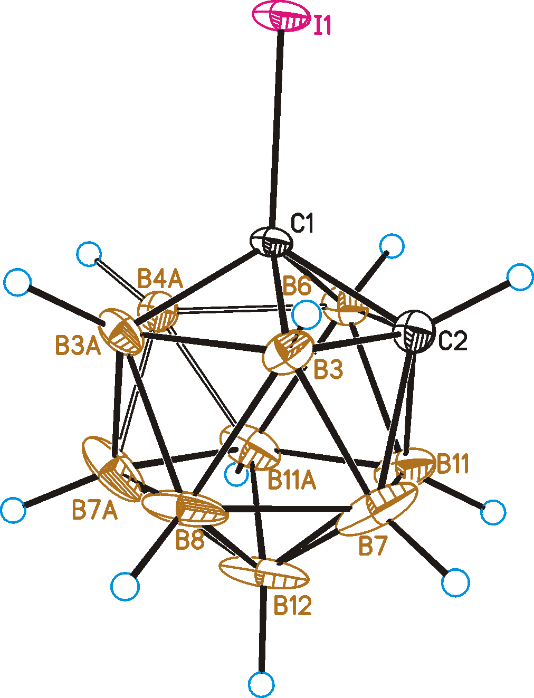


**Figure S2.** General view of 1-I-1,2-C2B10H11. Thermal ellipsoids are given at 50% probability level.

The main structure-forming interaction in the crystal of 1-I-C2B10H11 is the B8-H8⋯I1 hydride–halogen bond, which is formed by the σ-hole of the halogen atom and electron density accumulated onto the H8 atom due to the donation from carborane (H…I, 2.97Å, <B-H⋯I, 132°, <C-I⋯H, 167°) and can be considered as a true type II halogen bond, taking into account geometrical characteristics of this bond (Figure S3).


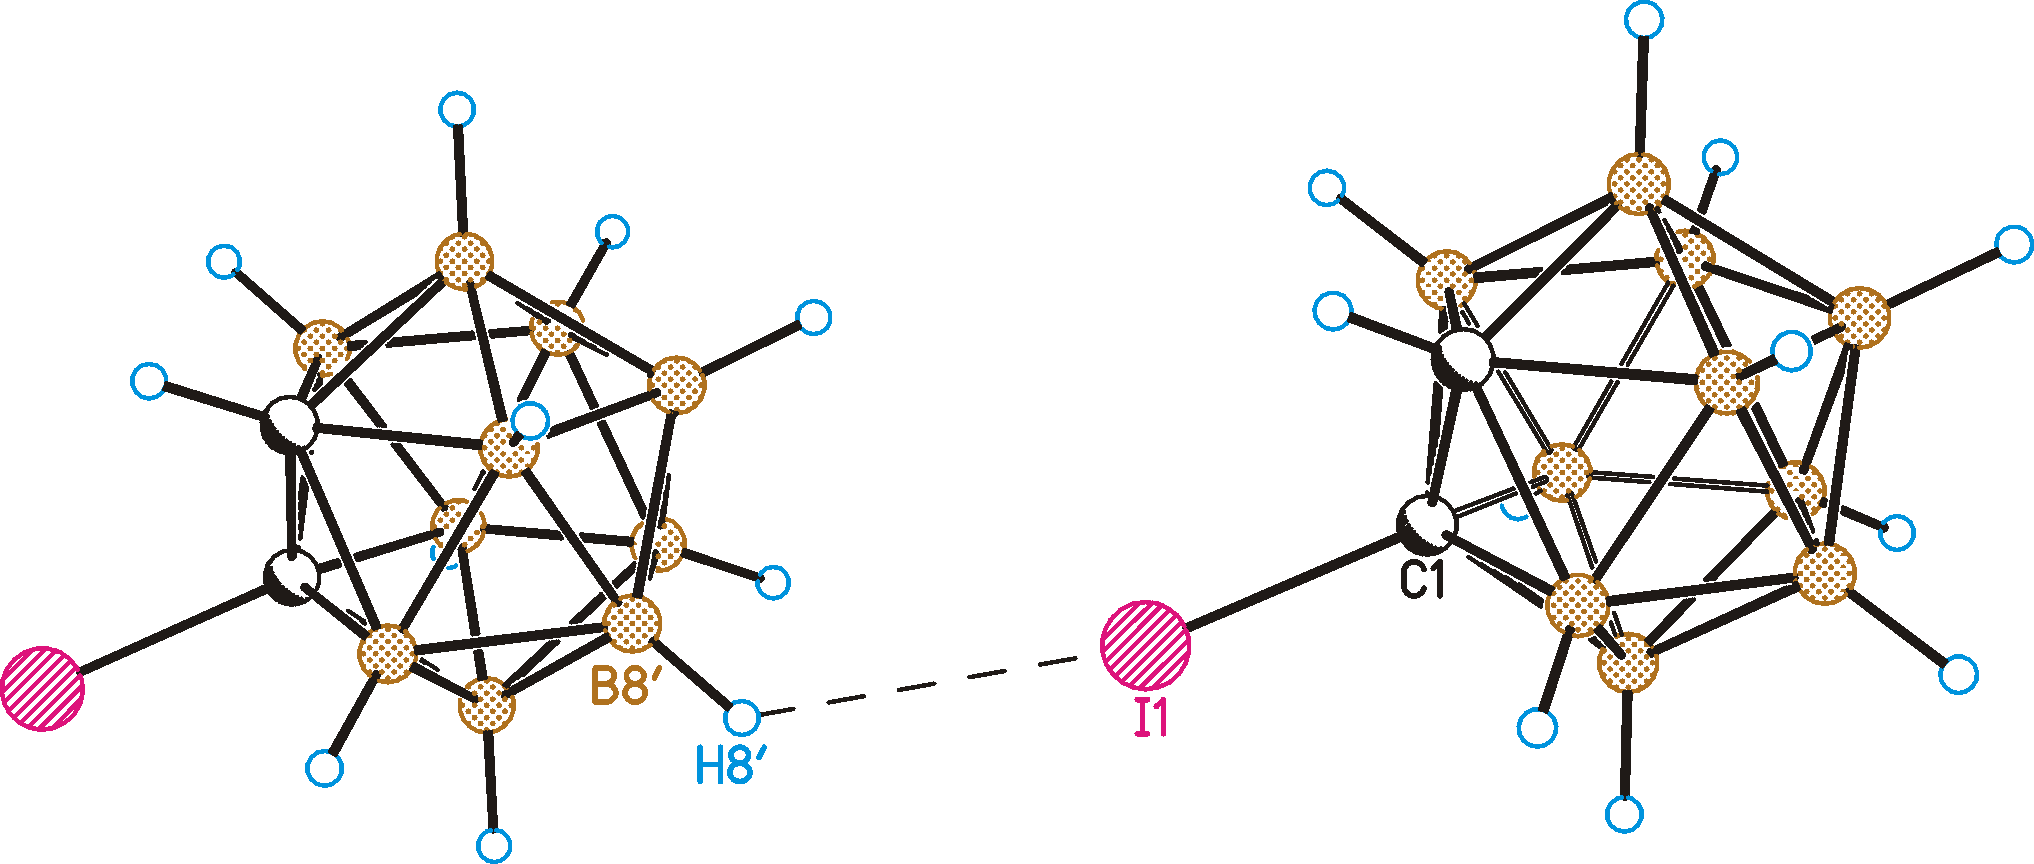


**Figure S3.** Halogen bonded dimer of 1-I-1,2-C2B10H11.
